# Supplementary material for: Hybrid Polylactic-Acid–Pectin Aerogels: Synthesis, Structural Properties, and Drug Release
Source: MDPI journal article supplement (doi:10.3390/polym15020407), 2023-01-12
Supplement: s1 [file s1]

## Supplementary Information

# Hybrid polylactic acid-pectin aerogels: synthesis, structural properties, and drug release

Gabrijela Horvat <sup>1</sup>, Klara Žvab <sup>1</sup>, Željko Knez <sup>1</sup> and Zoran Novak <sup>1,\*</sup>

<sup>1</sup> University of Maribor, Faculty of Chemistry and Chemical Engineering, Smetanova 17, SI-2000 Maribor, Slovenia

\* Correspondence: Zoran.novak@um.si;

## 1. Schematic presentation of supercritical extraction unit

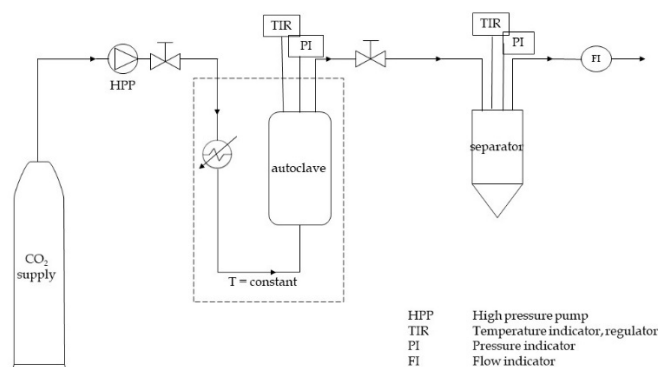

Figure S1. Modified supercritical extraction unit.

## 2. SEM

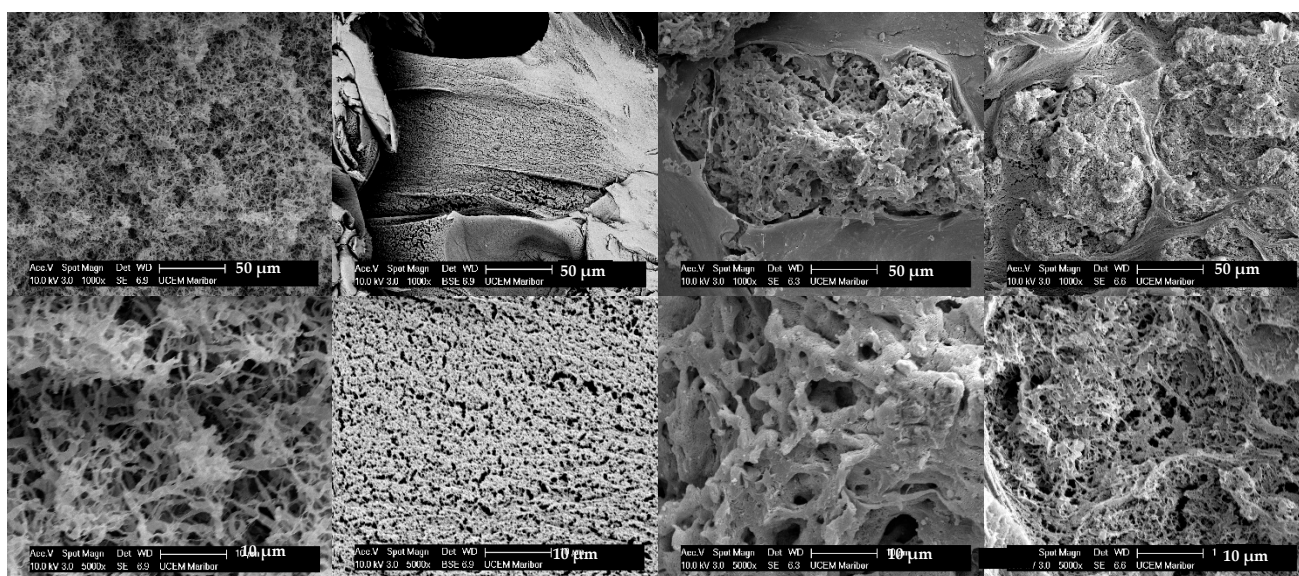

Figure S2. SEM picture of a) PLA, b) pectin, c) P1:PLA2, d) P1:PLA1

### 3. TG and DSC analysis of the drugs

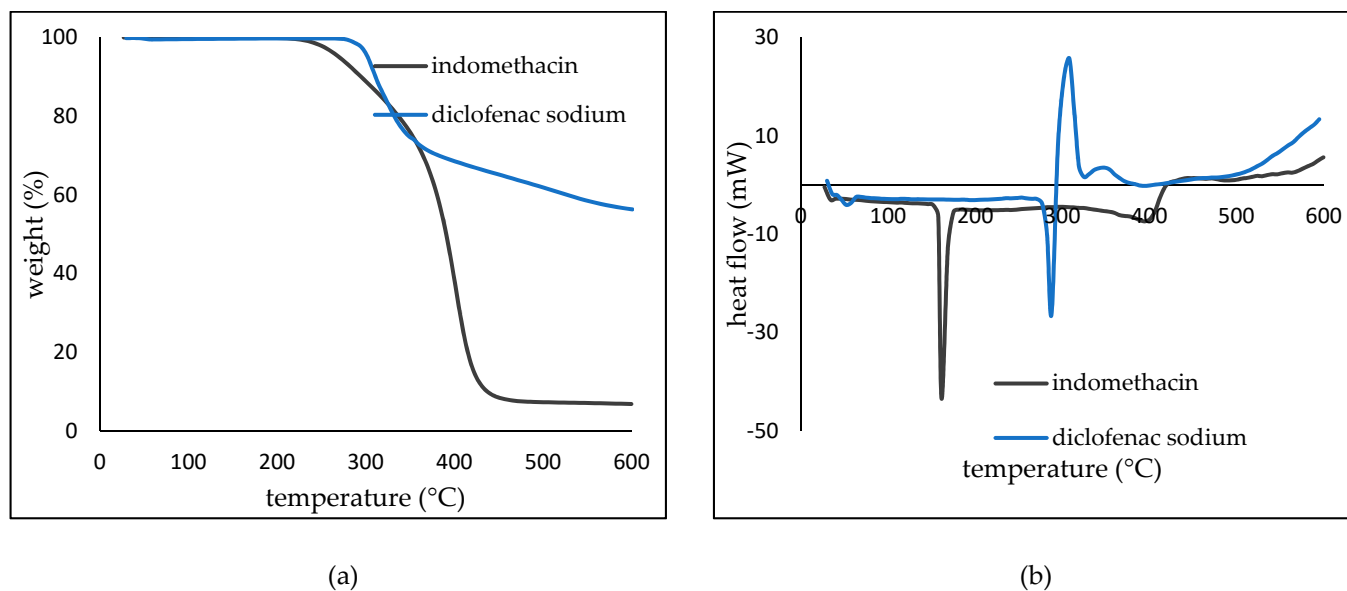

**Figure S3.** a) TG and b) DSC of indomethacin and diclofenac sodium.
